# Supplementary material for: Cleaning House: The Impact of Information Technology Monitoring on Employee Theft and Productivity
Source: Atypon-hosted journal article supplement (doi:10.1287/mnsc.2014.2103), 2015-05-13
Supplement: mnsc.2014.2103-sm-appendix_submit.pdf [file mnsc.2014.2103-sm-appendix_submit.pdf]

# Appendix

Figure A1 Number of Restaurant Locations by Week in the Dataset

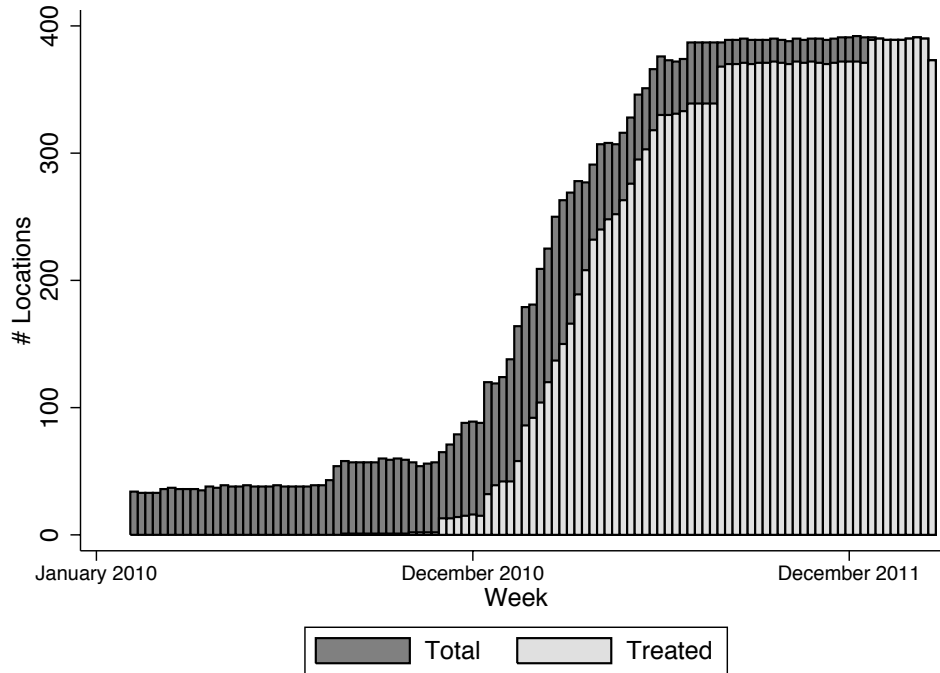

Note. Treated restaurants are those that have adopted the theft monitoring system.

Figure A2 Implementation Weeks by Pre-treatment Losses

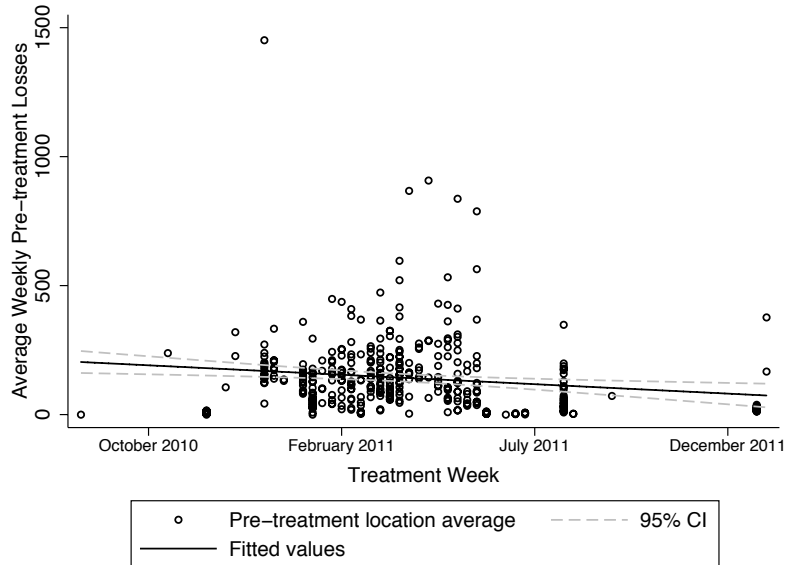

Note. Each point represents the average weekly total losses in USD for one restaurant, for all weeks prior to treatment. Regressing treatment week on the weekly loss amount with no controls yields a coefficient of  $-0.013$  ( $p = 0.001$ ).

Figure A3 Implementation Weeks by Pre-treatment Sales

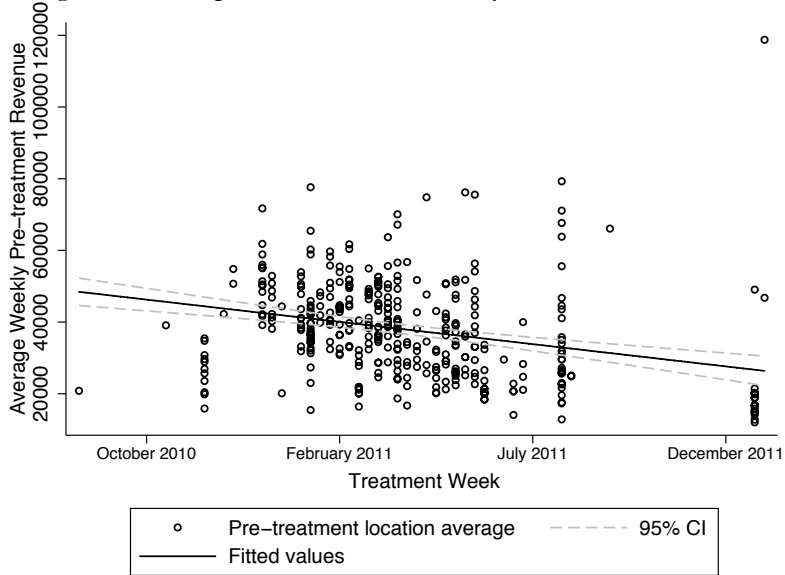

*Note.* Each point represents the average weekly check revenue in USD for one restaurant, for all weeks prior to treatment. Regressing treatment week on the weekly revenue with no controls yields a coefficient of  $-0.00025$  ( $p = 0.01$ )

Figure A4 Chain 1 Adoption Weeks by Pre-treatment Losses

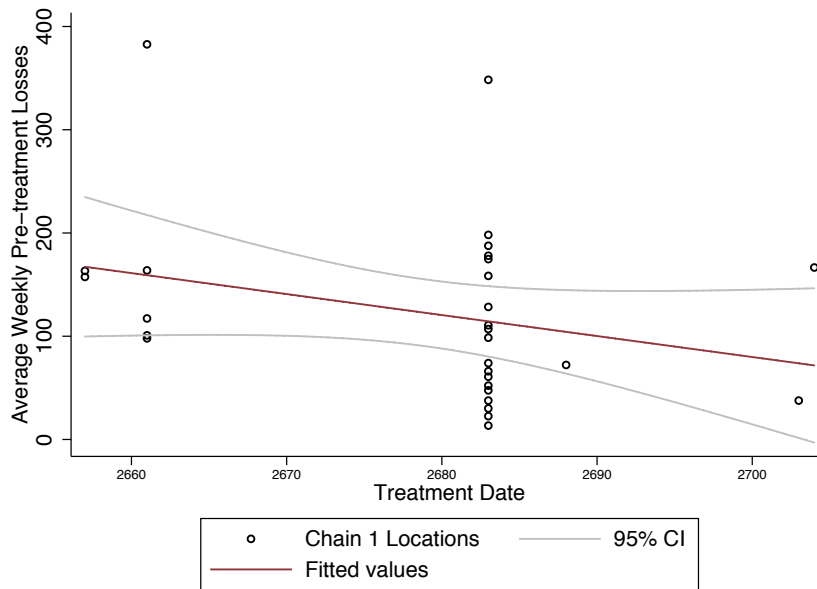

*Note.* Each point represents the adoption date of one location from Chain 1. Lines represents linear fit with 95% confidence intervals. Slope is not different from zero at the 10% level.

Figure A5 Chain 2 Adoption Weeks by Pre-treatment Losses

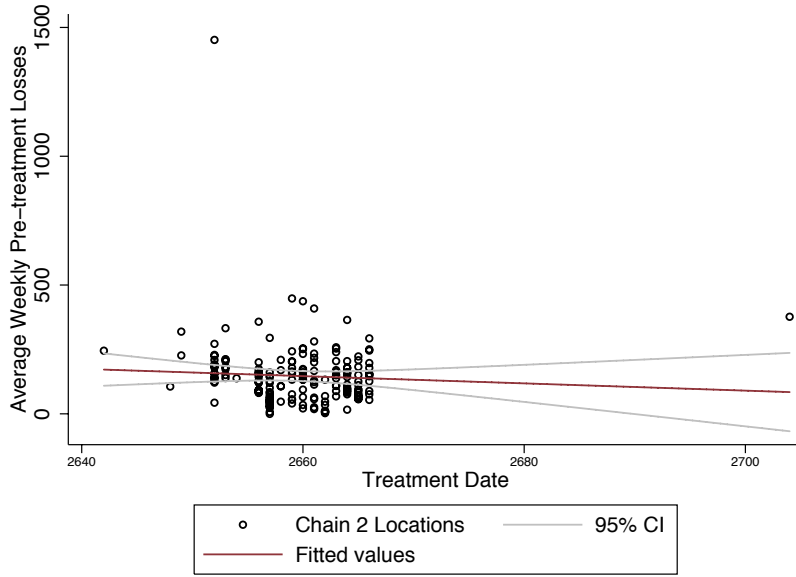

Note. Each point represents the adoption date of one location from Chain 2. Lines represents linear fit with 95% confidence intervals. Slope is not different from zero at the 10% level.

Figure A6 Chain 3 Adoption Weeks by Pre-treatment Losses

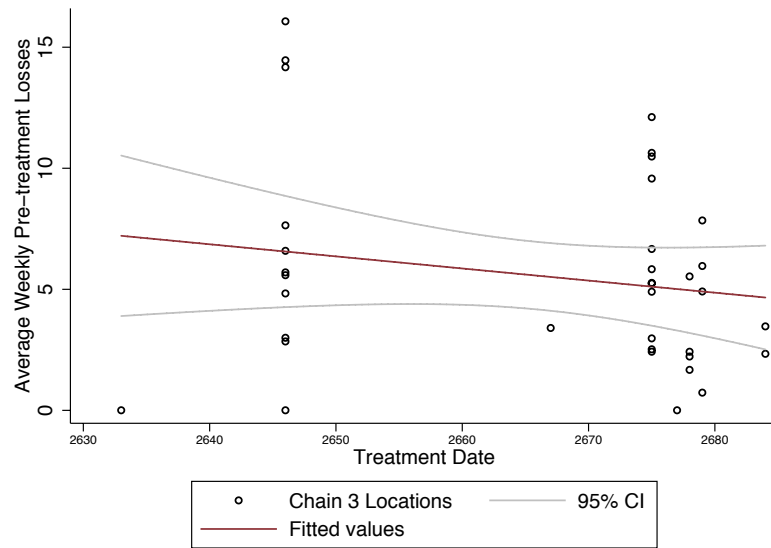

Note. Each point represents the adoption date of one location from Chain 3. Lines represents linear fit with 95% confidence intervals. Slope is not different from zero at the 10% level.

Figure A7 Chain 2 Adoption Weeks by Pre-treatment Losses

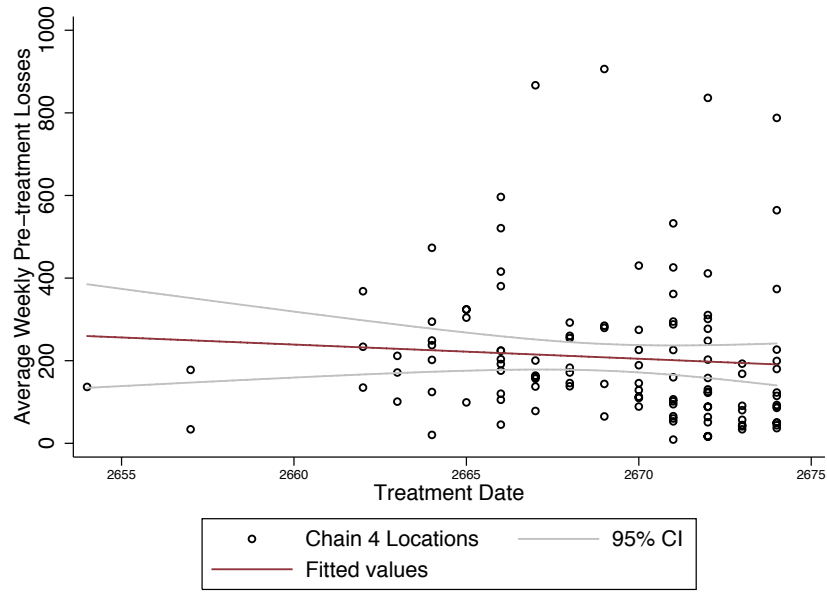

*Note.* Each point represents the adoption date of one location from Chain 4. Lines represents linear fit with 95% confidence intervals. Slope is not different from zero at the 10% level.

Figure A8 Chain 5 Adoption Weeks by Pre-treatment Losses

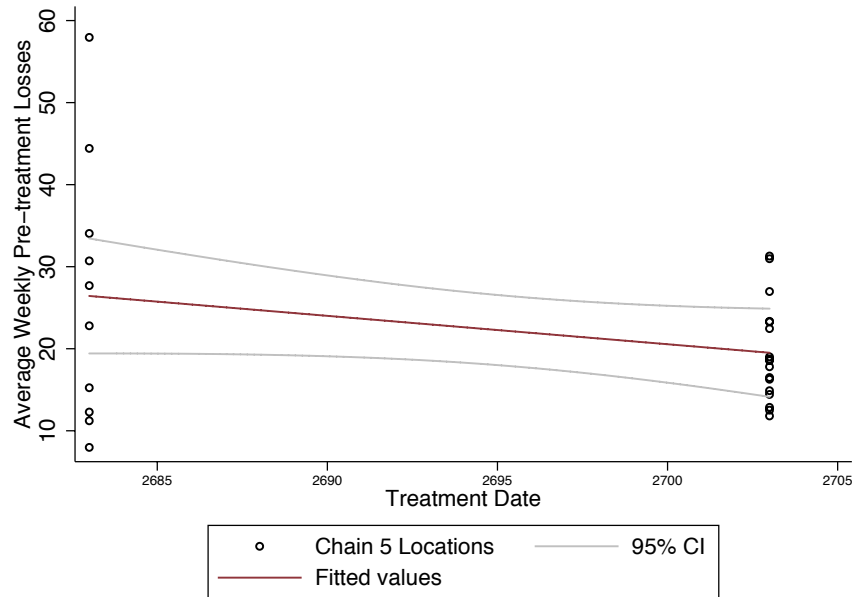

*Note.* Each point represents the adoption date of one location from Chain 5. Lines represents linear fit with 95% confidence intervals. Slope is not different from zero at the 10% level.

Figure A9 Treatment Effect on Drink Revenue in Chain 1

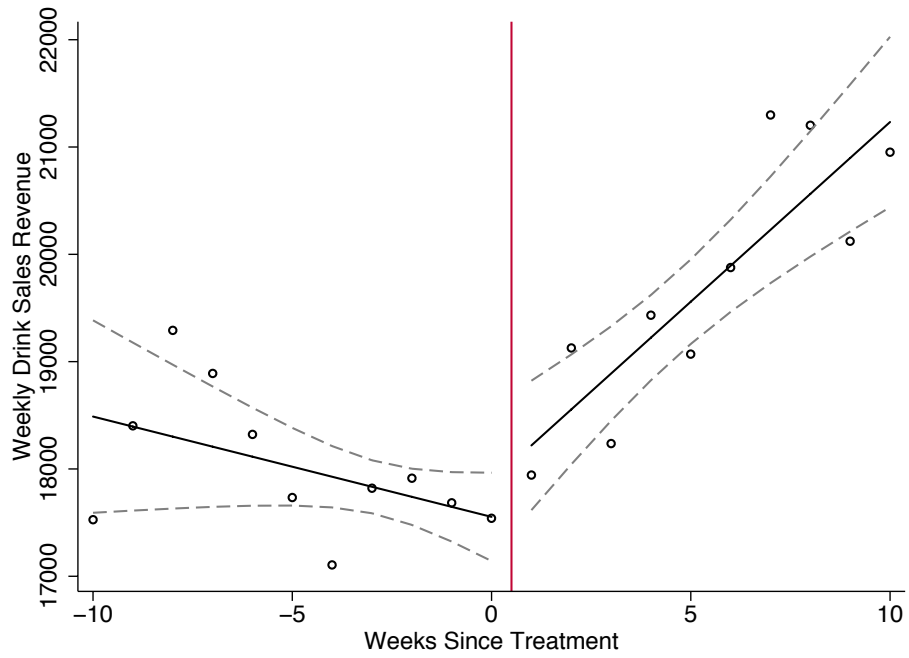

Note. Each point represents the average weekly drink revenue for 28 restaurants in Chain 1. Dashed lines represent 95% confidence intervals.

Figure A10 Treatment Effect on Tip Percentage in Chain 1

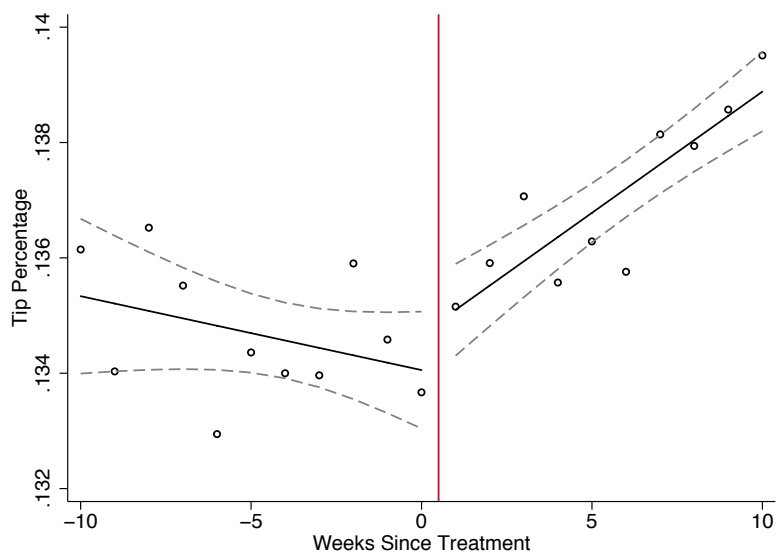

Note. Each point represents the average weekly tip percentage for 28 restaurants in Chain 1. Dashed lines represent 95% confidence intervals.

Figure A11 Placebo Tests of Treatment Effect on Total Revenue

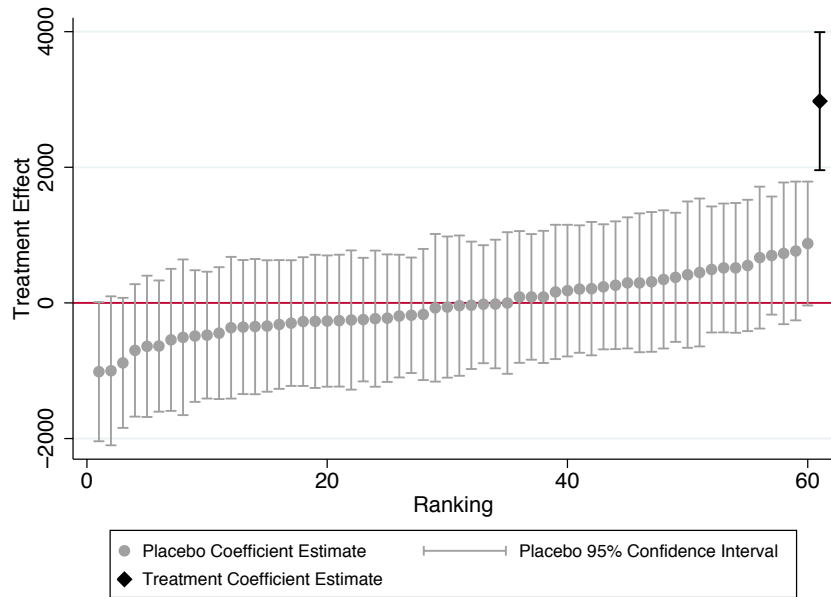

*Note.* Actual treatment dates were randomly assigned to restaurants 60 times. Each point and whisker represents an OLS regression with restaurant fixed effects and full controls, using the weekly restaurant data. The coefficient and confidence intervals for the true data are represented in black.

Figure A12 Placebo Tests of Treatment Effect on Drink Revenue

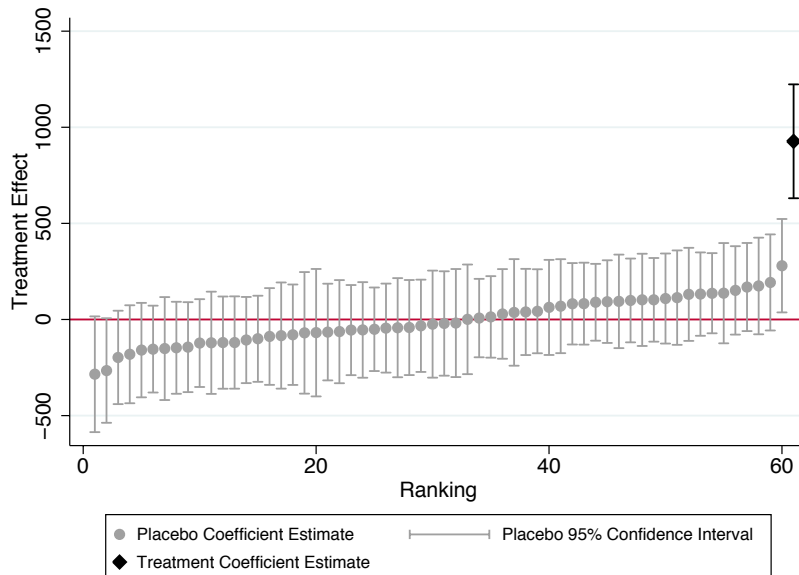

*Note.* Actual treatment dates were randomly assigned to restaurants 60 times. Each point and whisker represents an OLS regression with restaurant fixed effects and full controls, using the weekly restaurant data. The coefficient and confidence intervals for the true data are represented in black.

Figure A13 Placebo Tests of Treatment Effect on Total Losses

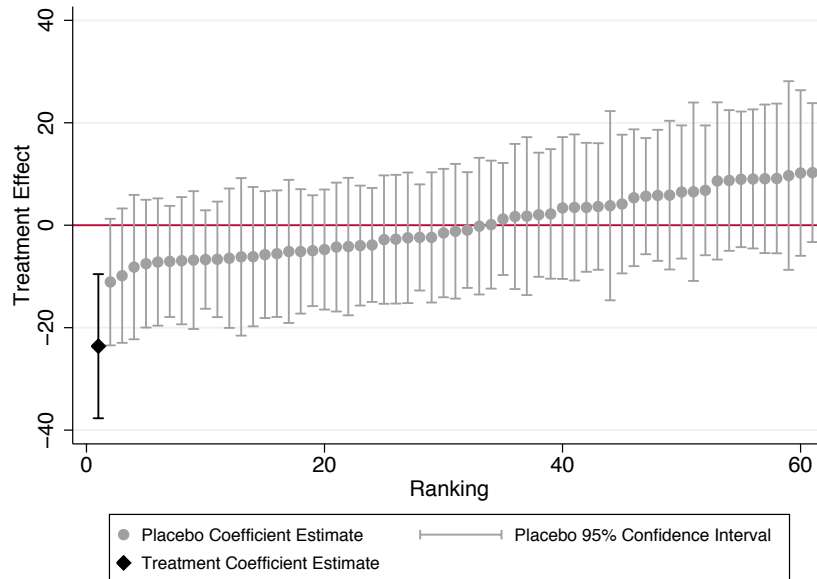

*Note.* Actual treatment dates were randomly assigned to restaurants 60 times. Each point and whisker represents an OLS regression with restaurant fixed effects and full controls, using the weekly restaurant data. The coefficient and confidence intervals for the true data are represented in black.

Figure A14 Placebo Tests of Treatment Effect on Tip Percentage

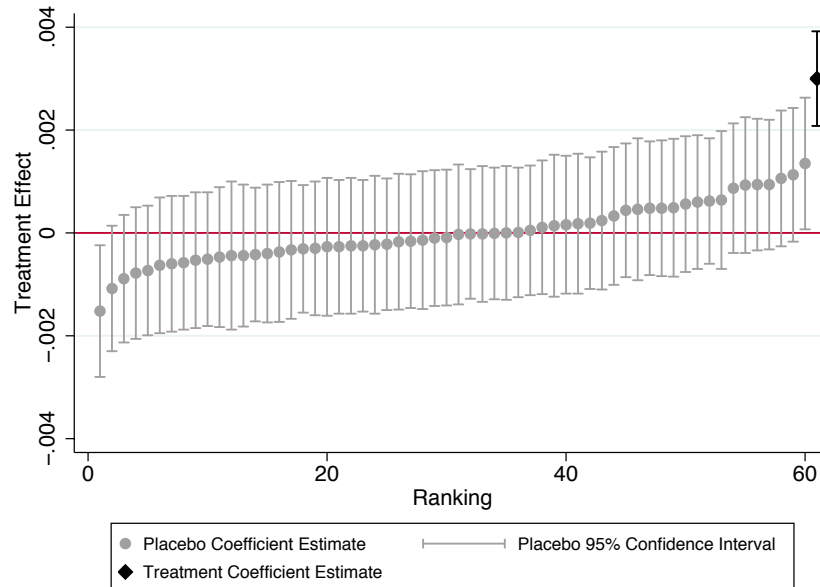

*Note.* Actual treatment dates were randomly assigned to restaurants 60 times. Each point and whisker represents an OLS regression with restaurant fixed effects and full controls, using the weekly restaurant data. The coefficient and confidence intervals for the true data are represented in black.

Figure A15 Treatment Effect Estimates for Total Losses Before and After IT Implementation

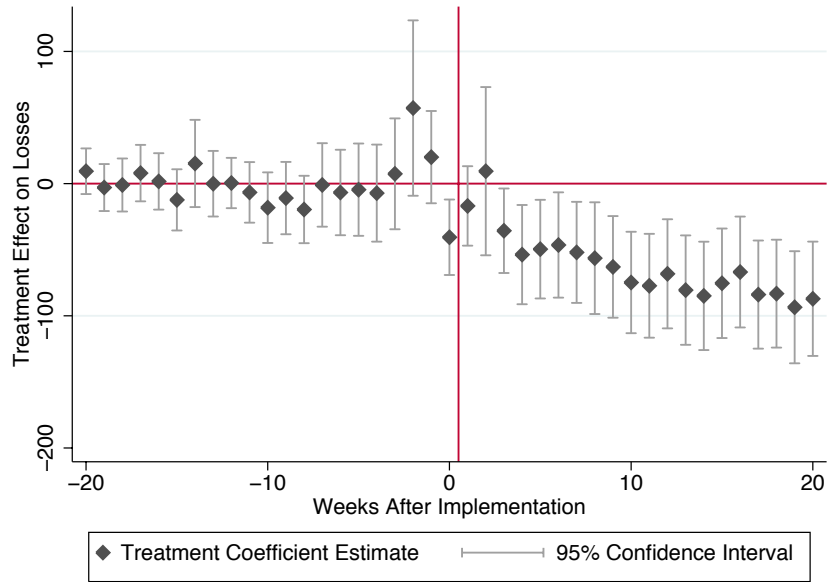

Note. Imprecise pre-treatment jump in losses based on one outlier location with \$3,273 and \$5,470 in losses three and two weeks before implementation, respectively.

Figure A16 Distribution of Hourly Drink Revenue Pre- and Post-Treatment

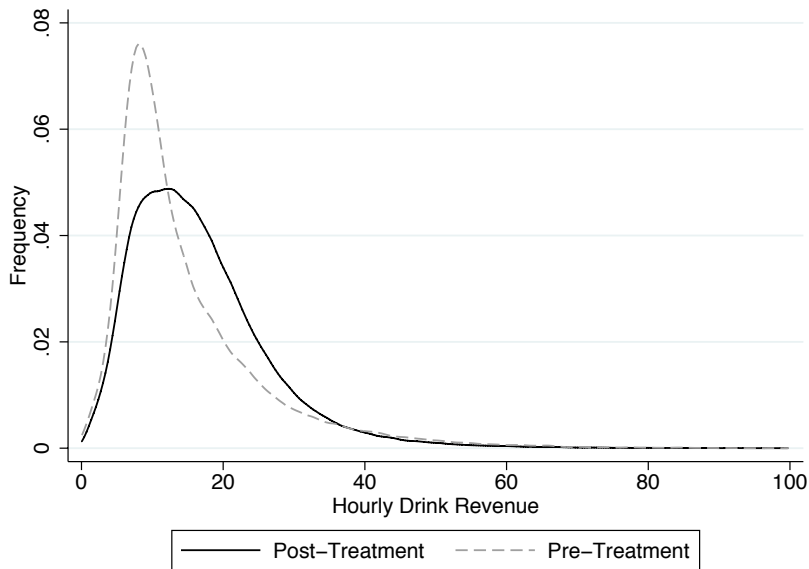

Note. Epinechnikov kernel density estimates of raw hourly drink revenue averages at the worker week level.

Figure A17 Distribution of Tip Percentages Pre- and Post-Treatment

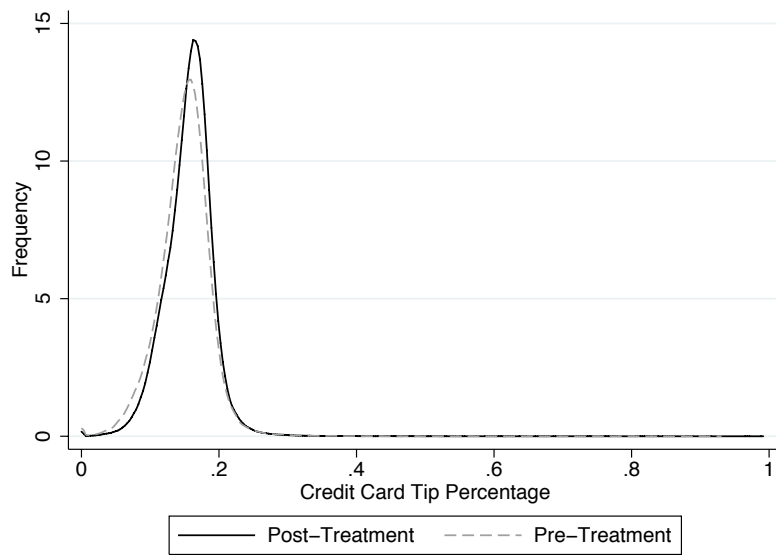

*Note.* Epinechnikov kernel density estimates of raw hourly drink revenue averages at the worker week level.

Table A1 Weekly Restaurant Means by Chain

| Variable       | Chain 1  | Chain 2  | Chain 3  | Chain 4  | Chain 5  |
|----------------|----------|----------|----------|----------|----------|
| Total Losses   | \$92.06  | \$124.01 | \$4.85   | \$180.00 | \$18.79  |
| Check Revenue  | \$50,639 | \$48,863 | \$25,257 | \$50,126 | \$17,199 |
| Drink Revenue  | \$17,149 | \$7,194  | \$3,401  | \$13,485 | \$4,711  |
| Tip Percentage | 13.6%    | 14.7%    | 14.1%    | 16.0%    | ---      |
| Week Added     | 2677.2   | 2659.0   | 2666.5   | 2668.5   | 2697.2   |
| Treated        | 0.41     | 0.92     | 0.44     | 0.97     | 0.31     |
| Locations      | 29       | 181      | 36       | 119      | 27       |
| Workers/Day    | 18.8     | 14.3     | 13.1     | 19.6     | 10.5     |
| Observations   | 2,219    | 10,081   | 3,588    | 5,143    | 1,298    |

Notes: Total losses represent theft identified by the IT system. Treated is a dummy variable indicating the theft monitoring system has been implemented. Week Added represents the week of theft monitoring implementation (in STATA format). Week 2656 is the first week in March, 2011. All numbers represent means. Chain 5 does not report tips.

Table A2 Models Using Block-Bootstrapped Standard Errors

| Dependent variable:                 | Location models     |                          |                         |                       | Worker models           |                             |                             |                       |
|-------------------------------------|---------------------|--------------------------|-------------------------|-----------------------|-------------------------|-----------------------------|-----------------------------|-----------------------|
|                                     | (1)<br>Losses       | (2)<br>Check<br>revenue  | (3)<br>Drink<br>revenue | (4)<br>Tip pct.       | (5)<br>Hourly<br>losses | (6)<br>Hourly<br>check rev. | (7)<br>Hourly<br>drink rev. | (8)<br>Tip pct.       |
| <i>Treated with Rest.<br/>Guard</i> | -23.61***<br>(6.65) | 2,975.21***<br>(470.20)  | 926.97***<br>(142.88)   | 0.0030***<br>(0.0005) | -0.056***<br>(0.008)    | 2.690***<br>(0.186)         | 0.883***<br>(0.071)         | 0.0019***<br>(0.0003) |
| Week FE                             | Included            | Included                 | Included                | Included              | Included                | Included                    | Included                    | Included              |
| Location FE                         | Included            | Included                 | Included                | Included              | -                       | -                           | -                           | -                     |
| Worker FE                           | -                   | -                        | -                       | -                     | Included                | Included                    | Included                    | Included              |
| Constant                            | 122.31***<br>(7.08) | 30,162.30***<br>(960.69) | 7182.84***<br>(274.00)  | 0.1475***<br>(0.0011) | 0.164***<br>(0.007)     | 60.941***<br>(0.585)        | 12.009***<br>(0.185)        | 0.1574***<br>(0.0015) |
| Observations                        | 22,329              | 22,329                   | 22,329                  | 20,901                | 439,838                 | 439,838                     | 439,838                     | 437,860               |

*Note.* Standard errors are block bootstrapped by location level in columns (1)-(4) and block bootstrapped by worker in columns (5)-(8). \* significant at the 10% confidence level, \*\* significant at the 5% confidence level, \*\*\* significant at the 1% confidence level. Tip models have fewer observations due to some locations not tracking tips.

Table A3 Models Using Winsorized Dependent Variables

| Dependent variable:             | (1)<br>Losses       | (2)<br>Check<br>revenue  | (3)<br>Drink<br>revenue | (4)<br>Tip pct.       |
|---------------------------------|---------------------|--------------------------|-------------------------|-----------------------|
| <i>Treated with Rest. Guard</i> | -22.35***<br>(4.78) | 3040.54***<br>(484.45)   | 794.56***<br>(129.61)   | 0.0030***<br>(0.0005) |
| Week fixed effects              | Included            | Included                 | Included                | Included              |
| Location fixed effects          | Included            | Included                 | Included                | Included              |
| Constant                        | 112.00***<br>(3.33) | 31,291.70***<br>(869.15) | 7323.82***<br>(135.35)  | 0.1476***<br>(0.0011) |
| Adjusted R-squared              | 0.404               | 0.827                    | 0.896                   | 0.730                 |
| Observations                    | 22,329              | 22,329                   | 22,329                  | 20,912                |

*Note.* All data two standard deviations or more above the mean are winsorized. Data more than two standard deviations below the mean are winsorized in models (2)-(4). Standard errors clustered at the location level in parentheses. \* significant at the 10% confidence level, \*\* significant at the 5% confidence level, \*\*\* significant at the 1% confidence level. Tip models have fewer observations due to some locations not tracking tips.

Table A4 Models Using Logged Dependent Variables

| Dependent variable:             | Location models         |                             |                             |                           | Worker models           |                             |                             |                           |
|---------------------------------|-------------------------|-----------------------------|-----------------------------|---------------------------|-------------------------|-----------------------------|-----------------------------|---------------------------|
|                                 | (1)<br>Logged<br>losses | (2)<br>Logged<br>check rev. | (3)<br>Logged<br>drink rev. | (4)<br>Logged<br>tip pct. | (5)<br>Logged<br>losses | (6)<br>Logged<br>check rev. | (7)<br>Logged<br>drink rev. | (8)<br>Logged<br>tip pct. |
| <i>Treated with Rest. Guard</i> | -0.261***<br>(0.057)    | 0.100***<br>(0.014)         | 0.104***<br>(0.014)         | 0.0027***<br>(0.0004)     | -0.020***<br>(0.003)    | 0.047***<br>(0.007)         | 0.053***<br>(0.008)         | 0.0017***<br>(0.0003)     |
| Week fixed effects              | Included                | Included                    | Included                    | Included                  | Included                | Included                    | Included                    | Included                  |
| Shift controls                  | --                      | --                          | --                          | --                        | Included                | Included                    | Included                    | Included                  |
| Worker fixed effects            | --                      | --                          | --                          | --                        | Included                | Included                    | Included                    | Included                  |
| Location fixed effects          | Included                | Included                    | Included                    | Included                  | --                      | --                          | --                          | --                        |
| Constant                        | 4.065***<br>(0.241)     | 9.905***<br>(0.023)         | 8.414***<br>(0.044)         | 0.1374***<br>(0.0010)     | 0.086***<br>(0.005)     | 3.999***<br>(0.020)         | 2.384***<br>(0.029)         | 0.1455***<br>(0.0013)     |
| Adjusted R-squared              | 0.626                   | 0.835                       | 0.897                       | 0.726                     | 0.100                   | 0.631                       | 0.579                       | 0.337                     |
| Observations                    | 22,329                  | 22,329                      | 22,329                      | 20,912                    | 439,838                 | 439,838                     | 439,838                     | 437,860                   |

*Note.* Standard errors clustered at the location level in parentheses. \* significant at the 10% confidence level, \*\* significant at the 5% confidence level, \*\*\* significant at the 1% confidence level. Tip models have fewer observations due to some locations not tracking tips.

Table A5 Average Check Time Models

|                                 | (1)                     | (2)                     | (3)                     |
|---------------------------------|-------------------------|-------------------------|-------------------------|
| Sample:                         | Restaurant              | Worker                  | Worker                  |
| Dependent variable:             | Check time<br>(Minutes) | Check time<br>(Minutes) | Check time<br>(Minutes) |
| <i>Treated with Rest. Guard</i> | 0.327<br>(0.272)        | -0.161<br>(0.158)       | -0.225<br>(0.162)       |
| Week fixed effects              | Included                | Included                | Included                |
| Shift controls                  | --                      | Included                | Included                |
| Location fixed effects          | Included                | Included                | --                      |
| Worker fixed effects            | --                      | --                      | Included                |
| Constant                        | 47.348***<br>(1.104)    | 50.993***<br>(0.486)    | 51.219***<br>(0.458)    |
| Adjusted R-squared              | 0.838                   | 0.656                   | 0.483                   |
| Observations                    | 22,262                  | 438,679                 | 438,679                 |

*Note.* Check time is the average length of stay in minutes for tables. Standard errors clustered at the location level in parentheses. \* significant at the 10% confidence level, \*\* significant at the 5% confidence level, \*\*\* significant at the 1% confidence level.

Table A6 Persistence of Effects for Locations with Three Post-Treatment Months

|                          | (1)                 | (2)                      | (3)                    | (4)                   |
|--------------------------|---------------------|--------------------------|------------------------|-----------------------|
| Dependent variable:      | Losses              | Check<br>revenue         | Drink<br>revenue       | Tip pct.              |
| <i>Treatment month 1</i> | -8.53<br>(9.64)     | 4,320.90***<br>(533.69)  | 1041.88***<br>(178.49) | 0.0028***<br>(0.0006) |
| <i>Treatment month 2</i> | -32.26***<br>(7.84) | 4,940.41***<br>(515.18)  | 1285.32***<br>(176.25) | 0.0032***<br>(0.0006) |
| <i>Treatment month 3</i> | -52.06***<br>(8.67) | 2,468.52***<br>(518.54)  | 759.66***<br>(163.72)  | 0.0044***<br>(0.0006) |
| Week fixed effects       | Included            | Included                 | Included               | Included              |
| Location fixed effects   | Included            | Included                 | Included               | Included              |
| Constant                 | 128.10***<br>(4.17) | 31,284.22***<br>(776.27) | 7341.28***<br>(134.79) | 0.1475***<br>(0.0012) |
| Adjusted R-squared       | 0.174               | 0.816                    | 0.895                  | 0.728                 |
| Observations             | 21,303              | 21,303                   | 21,303                 | 20,810                |

*Note.* Standard errors clustered at the location level in parentheses. \* significant at the 10% confidence level, \*\* significant at the 5% confidence level, \*\*\* significant at the 1% confidence level. Tip models have fewer observations due to some locations not tracking tips.

Table A7 Models Using Left- and Right-Truncated Samples

|                                 | (1)                 | (2)                      | (3)                    | (4)                   | (5)                 | (6)                      | (7)                    | (8)                   |
|---------------------------------|---------------------|--------------------------|------------------------|-----------------------|---------------------|--------------------------|------------------------|-----------------------|
| Dependent variable:             | Losses              | Check revenue            | Drink revenue          | Tip pct.              | Losses              | Check revenue            | Drink revenue          | Tip pct.              |
| Sample start week               |                     |                          |                        |                       | 2660                | 2660                     | 2660                   | 2660                  |
| Sample end week                 | 2681                | 2681                     | 2681                   | 2681                  |                     |                          |                        |                       |
| <i>Treated with Rest. Guard</i> | -25.22***<br>(8.65) | 4,621.76***<br>(619.12)  | 764.68***<br>(172.48)  | 0.0025***<br>(0.0003) | -17.87**<br>(8.62)  | 2,804.30***<br>(650.44)  | 1329.28***<br>(185.72) | 0.0045***<br>(0.0005) |
| Week fixed effects              | Included            | Included                 | Included               | Included              | Included            | Included                 | Included               | Included              |
| Location fixed effects          | Included            | Included                 | Included               | Included              | Included            | Included                 | Included               | Included              |
| Constant                        | 119.79***<br>(4.86) | 27,635.63***<br>(694.29) | 6369.74***<br>(121.07) | 0.1708***<br>(0.0007) | 129.41***<br>(9.43) | 42,029.44***<br>(802.18) | 7688.61***<br>(193.89) | 0.1523***<br>(0.0006) |
| Adjusted R-squared              | 0.275               | 0.832                    | 0.898                  | 0.792                 | 0.163               | 0.823                    | 0.907                  | 0.706                 |
| Observations                    | 10,271              | 10,271                   | 10,271                 | 9,707                 | 18,584              | 18,584                   | 18,584                 | 17,376                |

*Note.* Columns (1)-(4) do not left truncate. Columns (5)-(8) do not right truncate. Standard errors clustered at the location level in parentheses. \* significant at the 10% confidence level, \*\* significant at the 5% confidence level, \*\*\* significant at the 1% confidence level. Tip models have fewer observations due to some locations not tracking tips.

Table A8 Models Using Treatment-Specific Time Trends

| Dependent variable:             | (1)                 | (2)                      | (3)                    | (4)                   |
|---------------------------------|---------------------|--------------------------|------------------------|-----------------------|
|                                 | Losses              | Check revenue            | Drink revenue          | Tip pct.              |
| <i>Treated with Rest. Guard</i> | -17.44**<br>(8.86)  | 6,861.18***<br>(1566.38) | 1932.81***<br>(625.27) | 0.0028***<br>(0.0008) |
| Week FE X treatment             | Included            | Included                 | Included               | Included              |
| Location fixed effects          | Included            | Included                 | Included               | Included              |
| Constant                        | 122.38***<br>(3.80) | 29,991.54***<br>(692.93) | 7140.51***<br>(127.81) | 0.1474***<br>(0.0011) |
| Adjusted R-squared              | 0.178               | 0.824                    | 0.893                  | 0.728                 |
| Observations                    | 22,329              | 22,329                   | 22,329                 | 20,912                |

*Note.* Standard errors clustered at the location level in parentheses. \* significant at the 10% confidence level, \*\* significant at the 5% confidence level, \*\*\* significant at the 1% confidence level. Tip models have fewer observations due to some locations not tracking tips.
